# Supplementary material
Source: MDPI journal article supplement (https://www.mdpi.com/1999-4907/6/7/2484)
Supplement: s1 [file s1]

**Supplementary**

**Table S1.** Dead wood tree species, number of logs per tree species, diameter and standard deviation.

| **Tree Species** | **Common Name** | **Logs (*n*)** | **Mean Diameter (cm)** | **Standard Deviation** |
| --- | --- | --- | --- | --- |
| **Angiosperms** | | | | |
| *Acer* spp. | Maple | 28 | 30.3 | 7.1 |
| *Betula pendula* | European birch | 29 | 31.5 | 7.4 |
| *Carpinus betulus* | European hornbeam | 29 | 32.7 | 5.5 |
| *Fagus sylvatica* | European beech | 29 | 30.2 | 5.2 |
| *Fraxinus excelsior* | European ash | 28 | 29.0 | 4.5 |
| *Populus* spp. | Poplar | 28 | 28.4 | 6.5 |
| *Prunus avium* | Wild cherry | 18 | 38.8 | 5.7 |
| *Quercus* spp. | Oak | 29 | 31.3 | 4.3 |
| *Tilia* spp. | Lime | 28 | 30.0 | 4.3 |
| **Conifers** | | | | |
| *Larix decidua* | European larch | 27 | 29.1 | 4.6 |
| *Picea abies* | Norway spruce | 29 | 29.8 | 5.3 |
| *Pinus sylvestris* | Scots pine | 29 | 30.8 | 5.6 |
| *Pseudotsuga menziesii* | Douglas fir | 29 | 31.5 | 4.6 |

**Table S2.** Best linear model for each tree species with log transformed CO2 emission rates as dependent variable showing standardized coefficients for significant independent variables‏‏.

| **Tree Species** | **Best Linear Model** | ***R*2** | ***p* value** | **Intercept** | **Temp 1** | **ForMI** | **expl. H-D 2** | **expl. S-C 3** | **Density 4** | **Water 5** | **C** | **N** | **SR 6** |
| --- | --- | --- | --- | --- | --- | --- | --- | --- | --- | --- | --- | --- | --- |
| ***Acer*** | 1 | - | - | 3.9601 | - | - | - | - | - | - | - | - | - |
| ***Betula*** | 1 + expl. + temp. + C + ForMI | 0.5393 | 0.0020 | 14.6884 | 0.4206 | 0.3396 | 0.4016 | −0.0272 | - | - | −0.3660 | - | - |
| ***Carpinus*** | 1 + expl. + density + temp. | 0.5157 | 0.0012 | 3.9909 | 0.3937 | - | 0.6732 | 0.3732 | −0.3194 | - | - | - | - |
| ***Fagus*** | 1 | - | - | 4.5722 | - | - | - | - | - | - | - | - | - |
| ***Fraxinus*** | 1 | - | - | 3.8353 | - | - | - | - | - | - | - | - | - |
| ***Larix*** | 1 + temp. + ForMI | 0.2926 | 0.0157 | 1.1386 | 0.4764 | 0.3481 | - | - | - | - | - | - | - |
| ***Picea*** | 1 + density + temp. + water | 0.5279 | 0.0004 | 5.1753 | 0.4706 | - | - | - | −0.5156 | −0.3508 | - | - | - |
| ***Pinus*** | 1 + temp. | 0.2604 | 0.0055 | 0.7100 | 0.5103 | - | - | - | - | - | - | - | - |
| ***Populus*** | 1 + temp. + N | 0.4029 | 0.0021 | 1.1976 | 0.4852 | - | - | - | - | - | - | 0.3769 | - |
| ***Prunus*** | 1 + temp. + SR | 0.4895 | 0.0065 | 1.2332 | 0.6086 | - | - | - | - | - | - | - | 0.5304 |
| ***Pseudotsuga*** | 1 + expl. + temp. +  water + ForMI | 0.5249 | 0.0028 | 3.4367 | 0.5961 | 0.4962 | 0.578 | 0.6024 | - | −0.4790 | - | - | - |
| ***Quercus*** | 1 + temp. | 0.2607 | 0.0046 | 1.9932 | 0.5106 | - | - | - | - | - | - | - | - |
| ***Tilia*** | 1 + density + temp. + ForMI | 0.5983 | 0.0001 | 3.5939 | 0.4507 | −0.2814 | - | - | −0.4831 | - | - | - | - |

1 temp.: wood temperature; 2 expl. H-D: exploratory Hainich-Dün; 3 expl. S-C: exploratory Schorfheide-Chorin; 4 density: wood density; 5 water: water content;
6 SR: fungal species richness.

**Table S3.** Fungal species inventory data sorted by Basidiomycota and Acsomycota based on presence-absence (*n* = 360 logs).

| **Fungal Species** | ***Carpinus*** | ***Betula*** | ***Fagus*** | ***Prunus*** | ***Tilia*** | ***Acer*** | ***Populus*** | ***Fraxinus*** | ***Quercus*** | ***Picea*** | ***Pinus*** | ***Larix*** | ***Pseudotsuga*** | **Total Logs** |
| --- | --- | --- | --- | --- | --- | --- | --- | --- | --- | --- | --- | --- | --- | --- |
| Logs of absent fungal colonization |  |  |  |  |  |  | 2 | 4 |  |  | 1 |  |  | 7 |
| **Basidiomycota** | | | | | | | | | | | | | |  |
| *Amphinema byssoides* |  |  |  |  |  |  |  |  |  | 1 |  |  |  | 1 |
| *Amylostereum areolatum* |  |  |  |  |  |  |  |  |  |  |  | 1 |  | 1 |
| *Antrodia serialis* |  |  |  |  |  |  |  |  |  | 2 |  | 1 |  | 3 |
| *Armillaria mellea s.l.* 1 | 15 | 6 | 10 | 7 | 11 | 14 | 16 | 9 | 11 | 12 | 15 | 9 | 10 | 145 |
| *Athelia neuhoffii* |  |  |  |  |  |  |  |  |  |  |  | 1 |  | 1 |
| *Basidioradulum radula* |  |  |  | 1 |  |  |  |  |  |  |  |  |  | 1 |
| *Bjerkandera adusta* | 8 | 10 | 4 | 4 | 2 | 2 |  |  | 4 |  |  | 1 |  | 35 |
| *Botryobasidium laeve* |  |  |  |  |  |  |  |  | 1 |  | 2 |  | 1 | 4 |
| *Botryobasidium pruinatum* |  |  |  | 1 | 1 |  | 2 |  |  | 2 | 1 |  | 1 | 8 |
| *Botryobasidium subcoronatum* | 1 |  |  |  |  |  | 1 |  |  | 2 | 1 |  | 1 | 6 |
| *Botryohypochnus isabellinus* | 2 |  | 2 | 1 |  |  | 1 | 1 | 1 | 4 | 4 | 4 | 2 | 22 |
| *Brevicellicium olivascens* |  |  |  |  |  | 1 |  |  |  |  |  |  |  | 1 |
| *Calocera cornea* | 1 |  | 2 | 1 | 1 |  |  |  |  |  |  |  |  | 5 |
| *Calocera furcata* |  |  |  |  |  |  |  |  |  | 9 | 2 | 1 | 1 | 13 |
| *Cerrena unicolor* |  | 1 |  |  |  |  |  |  |  |  |  |  |  | 1 |
| *Coniophora arida* |  |  |  |  |  |  |  |  |  |  |  | 3 |  | 3 |
| *Coniophora arida var. suffocata* |  |  |  |  |  |  |  |  |  | 1 |  | 1 |  | 2 |
| *Coniophora puteana* |  |  |  |  | 1 |  |  |  |  |  |  |  |  | 1 |
| *Coprinellus cf. domesticus* | 1 |  |  |  | 6 |  | 1 |  |  |  | 1 | 1 |  | 10 |
| *Crepidotus mollis* | 2 |  |  |  | 3 |  |  | 4 |  |  |  |  |  | 9 |
| *Dacrymyces stillatus* | 1 | 5 | 2 | 4 | 3 | 1 | 1 | 1 | 1 | 14 | 4 | 10 | 10 | 57 |
| *Datronia mollis* | 4 | 7 | 5 |  | 1 | 7 | 1 |  |  |  |  |  |  | 25 |
| *Exidia glandulosa* |  |  |  |  |  |  |  |  | 1 |  |  |  |  | 1 |
| *Exidia spec.* 2 |  |  | 1 |  | 1 |  |  | 1 |  |  | 1 |  |  | 4 |
| *Exidiopsis effusa* |  |  |  |  |  |  | 1 |  |  |  |  |  |  | 1 |

**Table S3.** *Cont.*

| **Fungal Species** | ***Carpinus*** | ***Betula*** | ***Fagus*** | ***Prunus*** | ***Tilia*** | ***Acer*** | ***Populus*** | ***Fraxinus*** | ***Quercus*** | ***Picea*** | ***Pinus*** | ***Larix*** | ***Pseudotsuga*** | **Total Logs** |
| --- | --- | --- | --- | --- | --- | --- | --- | --- | --- | --- | --- | --- | --- | --- |
| *Fomes fomentarius* |  |  | 2 | 3 |  | 1 |  |  | 1 |  |  |  |  | 7 |
| *Fomitopsis pinicola* |  |  |  | 3 |  |  |  |  |  | 13 | 1 | 1 | 9 | 27 |
| *Ganoderma applanatum* |  |  | 1 |  | 1 | 2 | 3 |  |  |  |  |  |  | 7 |
| *Gloeocystidiellum porosum* | 2 | 1 |  |  |  |  |  |  |  |  |  |  |  | 3 |
| *Gloeophyllum sepiarium* |  |  |  |  |  |  |  |  |  | 1 |  |  |  | 1 |
| *Gymnopilus spec.* 2 |  | 1 |  |  |  |  |  |  |  |  |  |  |  | 1 |
| *Heterobasidion annosum* |  |  |  |  |  |  |  |  |  | 2 | 1 | 1 | 4 | 8 |
| *Hyphoderma praetermissum* |  |  |  |  | 1 |  |  |  |  |  |  |  |  | 1 |
| *Hyphoderma puberum* |  |  |  |  |  |  |  |  | 1 |  |  |  |  | 1 |
| *Hyphoderma roseocremeum* |  |  |  | 2 |  |  |  |  |  |  |  |  |  | 2 |
| *Hyphoderma setigerum* | 2 | 2 |  |  | 1 |  |  |  |  |  |  |  |  | 5 |
| *Hyphodontia alutacea* |  |  |  |  |  |  |  |  |  |  |  | 1 |  | 1 |
| *Hyphodontia alutaria* |  |  |  |  |  |  |  |  |  |  | 1 |  |  | 1 |
| *Hyphodontia sambuci* |  |  |  |  |  |  | 1 |  |  |  |  |  |  | 1 |
| *Hyphodontia spec*.2 |  | 1 |  |  |  |  |  |  |  |  |  |  |  | 1 |
| *Hypholoma capnoides* |  |  |  |  |  |  |  |  |  | 1 |  |  | 2 | 3 |
| *Hypholoma fasciculare* |  |  |  |  |  |  |  | 1 | 3 |  |  |  | 1 | 5 |
| *Hypochniciellum ovoideum* | 1 |  |  |  |  |  |  |  |  |  |  |  |  | 1 |
| *Ischnoderma benzoinum* |  |  | 2 | 2 |  |  |  |  |  |  |  |  |  | 4 |
| *Lenzites betulina* | 1 | 1 | 1 | 1 |  | 1 |  |  |  |  |  |  |  | 5 |
| *Leptosporomyces mutabilis* |  |  |  |  |  |  |  |  |  |  |  | 1 |  | 1 |
| *Leucogyrophana pinastri* |  |  |  |  |  |  |  |  |  | 1 |  |  | 1 | 2 |
| *Lycoperdon pyriforme* | 1 | 1 |  |  |  |  |  |  | 1 |  |  | 1 |  | 4 |
| *Merismodes anomala* |  |  | 2 |  | 1 |  |  |  |  |  |  |  |  | 3 |
| *Mucronella calva* |  |  |  |  |  |  |  |  |  |  | 1 |  |  | 1 |
| *Mycena bulbosa* |  |  |  |  |  |  | 1 |  |  |  |  |  |  | 1 |
| *Mycena meliigena* |  |  |  |  | 1 |  | 1 | 1 |  |  |  |  |  | 3 |

**Table S3.** *Cont.*

| **Fungal Species** | ***Carpinus*** | ***Betula*** | ***Fagus*** | ***Prunus*** | ***Tilia*** | ***Acer*** | ***Populus*** | ***Fraxinus*** | ***Quercus*** | ***Picea*** | ***Pinus*** | ***Larix*** | ***Pseudotsuga*** | **Total Logs** |
| --- | --- | --- | --- | --- | --- | --- | --- | --- | --- | --- | --- | --- | --- | --- |
| *Mycena spec.* |  |  | 1 | 1 | 1 |  |  | 1 |  |  |  |  |  | 4 |
| *Panellus serotinus* | 1 |  |  | 3 |  |  |  |  |  |  |  |  |  | 4 |
| *Panellus stipticus* |  |  |  | 2 | 1 |  |  |  | 19 |  |  |  | 1 | 23 |
| *Phanerochaete laevis* |  |  |  | 1 | 1 |  |  |  |  |  |  |  |  | 2 |
| *Phanerochaete sanguinea* |  |  |  |  |  |  |  |  |  |  |  | 1 |  | 1 |
| *Phanerochaete tuberculata* |  |  | 1 |  | 1 |  |  |  |  |  |  |  |  | 2 |
| *Phlebia livida* |  |  |  |  |  |  |  |  | 1 |  |  |  |  | 1 |
| *Phlebia merismoides* | 4 |  |  | 2 | 1 | 1 |  |  |  |  |  |  |  | 8 |
| *Phlebia radiata* |  |  | 1 |  |  |  |  |  |  |  |  |  |  | 1 |
| *Phlebia rufa* |  |  |  |  |  |  |  |  |  |  | 1 |  |  | 1 |
| *Phlebia tremellosa* |  |  |  | 1 |  |  |  |  |  |  |  |  |  | 1 |
| *Phlebiella vaga* | 1 |  |  |  |  |  |  |  |  |  |  |  | 2 | 3 |
| *Phlebiopsis gigantea* |  |  |  |  |  |  |  |  |  |  | 2 |  | 1 | 3 |
| *Pholiota populnea* |  |  |  |  |  |  | 3 |  |  |  |  |  |  | 3 |
| *Pleurotus ostreatus* |  |  |  |  | 1 |  |  |  |  |  |  |  |  | 1 |
| *Porotheleum fimbriatum* |  |  |  |  |  |  |  |  |  |  |  | 1 |  | 1 |
| *Postia balsamea* |  |  | 1 |  |  |  |  |  |  |  |  |  |  | 1 |
| *Postia caesia* |  |  |  |  |  |  |  |  |  | 2 |  | 1 | 1 | 4 |
| *Postia ptychogaster* | 1 |  |  |  |  |  |  |  |  |  |  |  |  | 1 |
| *Pycnoporus cinnabarinus* |  |  |  | 1 |  |  |  |  |  |  |  |  |  | 1 |
| *Ramaria stricta* |  |  | 1 |  |  |  |  |  |  |  |  |  | 1 | 2 |
| *Resinicium bicolor* |  |  |  |  |  |  |  |  |  | 1 | 1 |  |  | 2 |
| *Rigidoporus vitreus* |  |  |  |  |  |  | 1 |  |  |  |  |  |  | 1 |
| *Schizophyllum commune* |  |  |  |  |  | 1 |  |  |  |  |  |  |  | 1 |
| *Schizopora flavipora* | 5 |  | 2 |  | 1 |  |  |  | 1 |  |  |  |  | 9 |
| *Schizopora radula* | 2 |  |  |  |  |  |  |  |  |  |  |  |  | 2 |
| *Scopuloides rimosa* |  |  |  |  |  |  |  |  |  | 1 |  |  | 1 | 2 |

**Table S3.** *Cont.*

| **Fungal Species** | ***Carpinus*** | ***Betula*** | ***Fagus*** | ***Prunus*** | ***Tilia*** | ***Acer*** | ***Populus*** | ***Fraxinus*** | ***Quercus*** | ***Picea*** | ***Pinus*** | ***Larix*** | ***Pseudotsuga*** | **Total Logs** |
| --- | --- | --- | --- | --- | --- | --- | --- | --- | --- | --- | --- | --- | --- | --- |
| *Scutellinia cejpii* |  |  |  |  |  |  |  |  |  |  | 2 |  |  | 2 |
| *Scutellinia scutellata* | 1 |  |  | 1 |  |  |  |  |  | 2 | 2 |  |  | 6 |
| *Sebacina incrustans* | 1 |  |  |  |  |  |  |  |  | 1 |  |  | 1 | 3 |
| *Serpula himantioides* |  |  |  |  |  |  |  |  |  | 1 |  | 1 |  | 2 |
| *Sistotrema spec*. 2 | 1 |  |  |  |  |  |  |  |  |  |  |  |  | 1 |
| *Skeletocutis amorpha* |  |  |  |  |  |  |  |  |  | 1 | 7 |  | 1 | 9 |
| *Sphaerobolus stellatus* |  |  |  |  |  |  | 1 |  |  |  |  |  |  | 1 |
| *Stereum gausapatum* | 2 | 1 |  |  |  |  |  |  | 2 |  |  |  |  | 5 |
| *Stereum hirsutum* | 26 | 12 | 7 | 1 |  | 1 |  |  | 24 |  |  |  |  | 71 |
| *Stereum ochraceoflavum* |  |  | 1 |  |  |  |  |  |  |  |  |  |  | 1 |
| *Stereum rugosum* |  | 13 |  |  |  |  |  |  | 3 |  |  |  |  | 16 |
| *Stereum sanguinolentum* |  |  |  |  |  |  |  |  |  | 14 | 15 | 23 | 22 | 74 |
| *Stereum subtomentosum* |  |  | 4 | 1 |  |  |  |  |  |  |  |  |  | 5 |
| *Thelephora terrestris var. resupinata* |  |  |  |  |  |  |  |  |  | 1 |  |  |  | 1 |
| *Tomentella spec*. 2 |  |  | 2 | 1 | 1 |  |  | 1 | 2 | 4 | 2 | 2 | 2 | 17 |
| *Trametes gibbosa* |  |  | 1 | 2 |  |  |  |  | 2 |  |  |  |  | 5 |
| *Trametes hirsuta* |  | 4 | 1 | 2 | 1 |  |  | 1 | 3 |  |  |  |  | 12 |
| *Trametes versicolor* | 6 | 19 | 5 | 7 |  | 1 | 1 | 1 | 6 |  |  |  | 2 | 48 |
| *Trechispora mollusca* |  |  |  |  |  |  |  |  | 1 |  |  |  |  | 1 |
| *Trichaptum abietinum* |  |  |  |  |  |  |  |  |  | 8 | 2 |  | 1 | 11 |
| *Tubaria spec*. 2 |  |  |  |  | 1 |  |  |  |  |  |  |  |  | 1 |
| *Tulasnella tomaculum* |  |  |  |  |  |  |  |  |  | 1 |  |  |  | 1 |

**Table S3.** *Cont.*

| **Fungal Species** | ***Carpinus*** | ***Betula*** | ***Fagus*** | ***Prunus*** | ***Tilia*** | ***Acer*** | ***Populus*** | ***Fraxinus*** | ***Quercus*** | ***Picea*** | ***Pinus*** | ***Larix*** | ***Pseudotsuga*** | **Total Logs** |
| --- | --- | --- | --- | --- | --- | --- | --- | --- | --- | --- | --- | --- | --- | --- |
| **Ascomycota** | | | | | | | | | | | | | |  |
| *Annulohypoxylon cohaerens* | 1 | 1 | 5 |  |  |  |  |  |  |  |  |  |  | 7 |
| *Annulohypoxylon multiforme* | 7 | 17 | 16 |  | 1 |  |  | 1 |  |  |  |  |  | 42 |
| *Ascocoryne cylichnium* | 1 |  |  |  |  |  |  |  |  | 2 |  |  |  | 3 |
| *Ascocoryne sarcoides* | 2 | 2 |  | 2 |  |  | 1 | 1 |  |  |  | 3 | 2 | 13 |
| *Ascocoryne spec*. 2 | 3 | 4 | 1 |  |  | 1 | 1 |  | 1 |  |  |  |  | 11 |
| *Bertia moriformis* |  |  | 1 |  | 1 |  | 1 |  |  |  |  |  | 1 | 4 |
| *Bisporella citrina* |  | 2 |  |  |  |  |  |  |  |  |  |  |  | 2 |
| *Chaetosphaeria innumera* |  |  |  |  |  |  |  |  | 2 |  |  |  |  | 2 |
| *Coniochaeta ligniaria* |  |  |  |  |  |  | 1 |  |  |  |  |  |  | 1 |
| *Eutypa acharii* | 1 |  |  |  |  |  |  |  |  |  |  |  |  | 1 |
| *Eutypa lata* | 7 |  | 7 | 1 |  | 21 | 1 | 1 |  |  |  |  |  | 38 |
| *Eutypa spinosa* |  |  | 3 |  |  |  |  |  |  |  |  |  |  | 3 |
| *Eutypa velutina* | 1 |  |  |  |  |  |  |  |  |  |  |  |  | 1 |
| *Holwaya mucida* |  |  |  |  |  |  |  |  |  |  |  | 1 |  | 1 |
| *Hypocrea cf. rufa* 3 | 8 | 1 | 7 |  |  | 2 | 1 | 1 | 2 |  |  |  |  | 22 |
| *Hypocrea gelatinosa* |  |  |  |  | 1 |  |  | 1 |  |  |  |  |  | 2 |
| *Hypoxylon fragiforme* | 7 | 1 | 16 |  |  | 1 |  |  |  |  |  |  |  | 25 |
| *Hypoxylon fuscum* | 11 |  |  |  |  |  |  |  |  |  |  |  |  | 11 |
| *Hypoxylon rubiginosum* | 14 | 2 | 16 | 2 | 6 | 5 | 4 | 11 |  |  |  |  |  | 60 |
| *Hysterium angustatum* |  |  |  |  |  |  | 2 |  |  |  |  |  |  | 2 |
| *Hysterium pulicare* |  | 1 |  |  |  |  |  |  |  |  |  |  |  | 1 |
| *Lasiosphaeria hirsuta* |  |  | 1 |  | 3 | 1 | 1 | 1 |  |  |  |  |  | 7 |
| *Lasiosphaeria ovina* | 1 | 2 | 2 | 1 | 4 | 1 | 3 | 1 | 1 |  |  |  |  | 16 |
| *Lasiosphaeria spermoides* | 2 | 1 | 2 | 1 | 3 | 2 | 2 | 5 | 1 |  |  |  |  | 19 |
| *Melanomma pulvis-pyrius* | 11 | 8 | 11 | 2 | 8 | 6 | 1 | 8 | 3 |  |  |  |  | 58 |
| *Melanopsammella preussii* |  |  |  |  |  |  |  |  | 1 |  |  |  |  | 1 |

**Table S3.** *Cont.*

| **Fungal Species** | ***Carpinus*** | ***Betula*** | ***Fagus*** | ***Prunus*** | ***Tilia*** | ***Acer*** | ***Populus*** | ***Fraxinus*** | ***Quercus*** | ***Picea*** | ***Pinus*** | ***Larix*** | ***Pseudotsuga*** | **Total Logs** |
| --- | --- | --- | --- | --- | --- | --- | --- | --- | --- | --- | --- | --- | --- | --- |
| *Mollisia fusca* | 2 | 1 | 1 | 1 | 1 | 1 | 2 |  | 2 |  |  |  |  | 11 |
| *Nectria cinnabarina* |  |  |  |  | 3 |  |  |  |  |  |  |  |  | 3 |
| *Nectria coccinea* |  |  |  |  |  | 1 | 3 |  | 1 |  |  |  |  | 5 |
| *Neobulgaria pura* |  |  | 1 |  |  |  |  |  |  |  |  |  |  | 1 |
| *Nitschkia grevillei* |  |  |  |  |  | 1 |  |  |  |  |  |  |  | 1 |
| *Peziza micropus* |  |  |  |  | 1 |  |  |  |  |  |  |  |  | 1 |
| *Xylaria hypoxylon* | 2 | 1 |  |  |  | 3 | 1 | 2 |  |  |  |  |  | 9 |
| *Xylaria longipes* |  |  |  |  |  | 3 |  |  |  |  |  |  |  | 3 |
| *Xylaria polymorpha* |  |  | 1 |  |  |  |  |  |  |  |  |  |  | 1 |
| **Fungal species richness** | **44** | **24** | **42** | **33** | **36** | **26** | **31** | **22** | **28** | **25** | **23** | **24** | **26** | **136** |

Determination comments: **1** mainly rhizomorphs present; **2**immature fruit bodies or atypical developed; **3** fungal culture is required.
